# Supplementary material
Source: publisher figshare collection journal article supplement (https://acs.figshare.com/ndownloader/files/13079699)
Supplement: Supplementary file 1 [file 13079699]

# Single Particle Spectroscopic Studies on Two-photon Photoluminescence of Coupled Au Nanorod Dimers

Monalisa Garai, Nengyue Gao, and Qing-Hua Xu\*

<sup>1</sup>Department of Chemistry, National University of Singapore, 3 Science Drive 3, Singapore 117543; E-mail: [chmxqh@nus.edu.sg](mailto:chmxqh@nus.edu.sg)

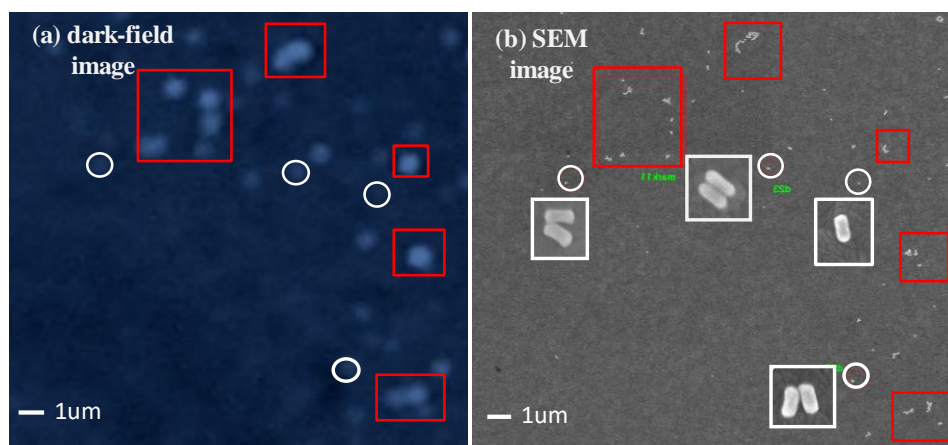

**Figure S1.** Pattern matching between dark-field scattering image (a) and SEM image (b).

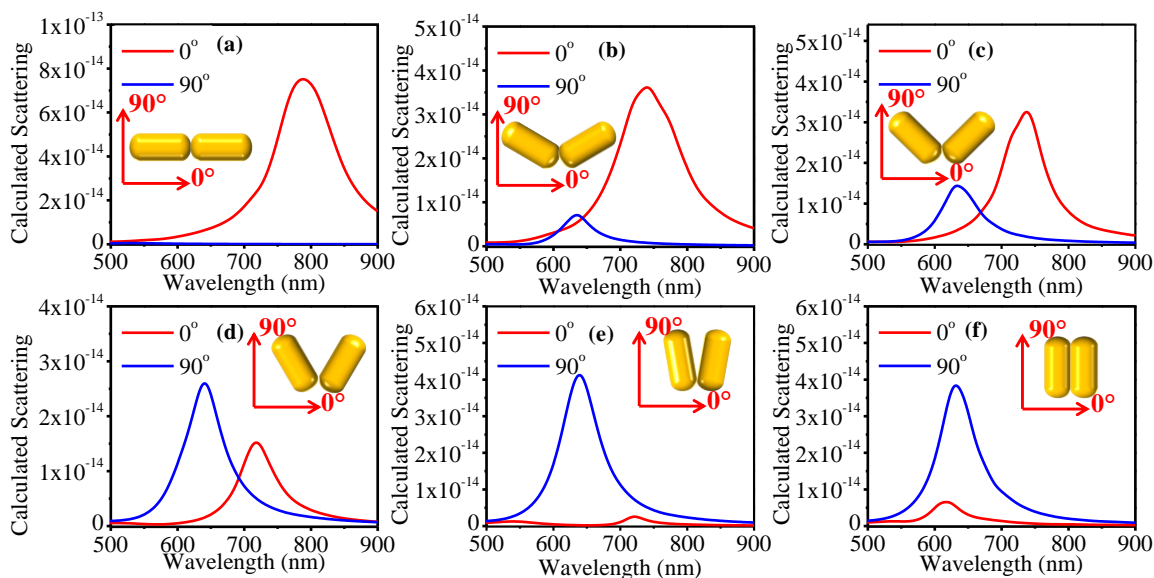

**Figure S2.** Calculated scattering spectra of Au NR dimers of different geometries under  $\theta=0^\circ$  and  $\theta=90^\circ$  polarizations.

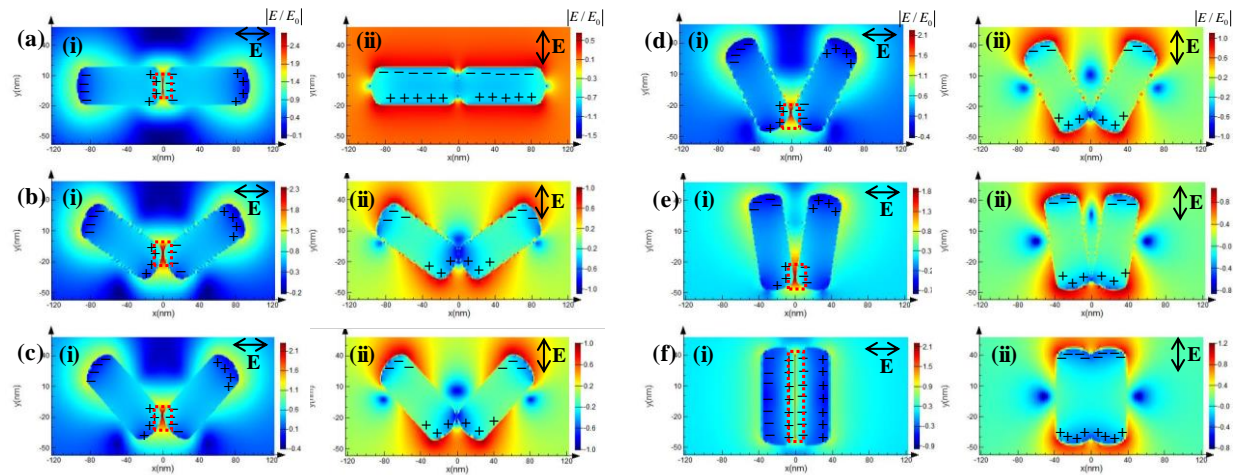

**Figure S3.** (a-f) Log-plot of E-field ( $|E/E_0|$ ) enhancements and the associated charge distribution of Au NR dimers under  $0^\circ$  (i) and  $90^\circ$  (ii) polarizations.

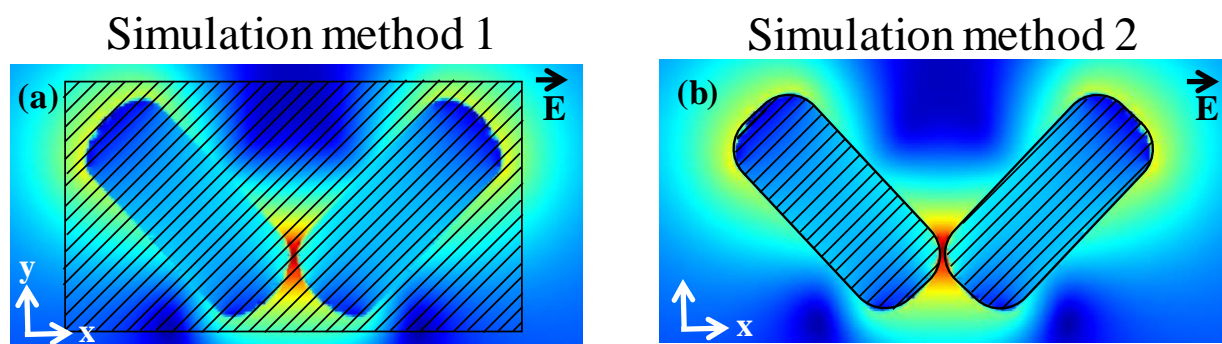

**Figure S4.** Graphic illustrations of FDTD simulation method 1 (a) and method 2 (b) for Au NR dimers. 2-dimensional integration was performed over the patterned areas as shown on the electric-field plots during electric-field calculations. 2-dimensional integral of E-field using method 1 was performed over a rectangular region on the X-Y plane that bisects the Au NRs through its center, which takes into account of both the metal nanoparticles and a part of surrounding region. 2-dimensional integration of E-field by method 2 was performed only over the metal nanoparticles, which includes the interior and the outer surface of the metal nanoparticles.
